# Supplementary material
Source: ML conference proceedings conference paper supplement (https://openreview.net/forum?id=P4PimLWG9E)

← Good prediction ← Bad prediction

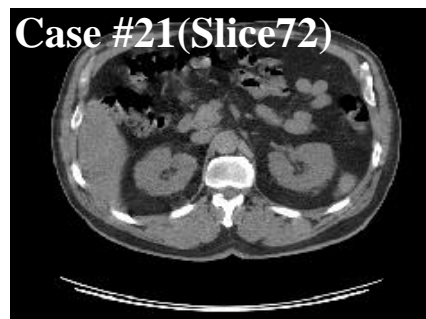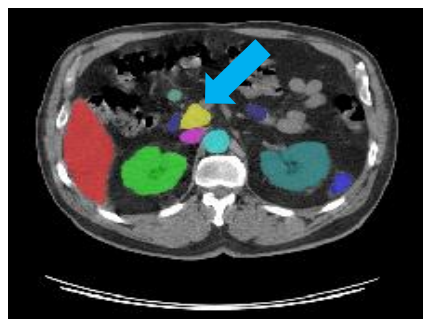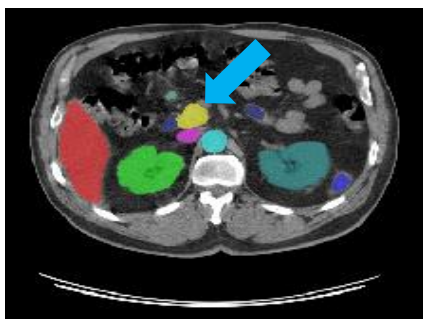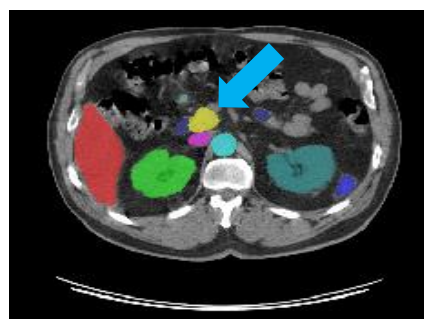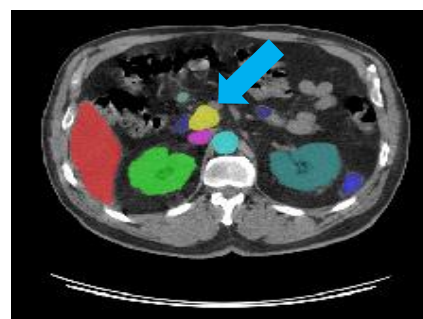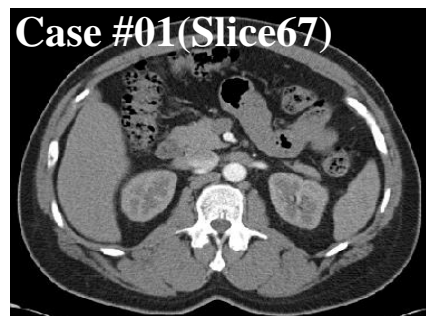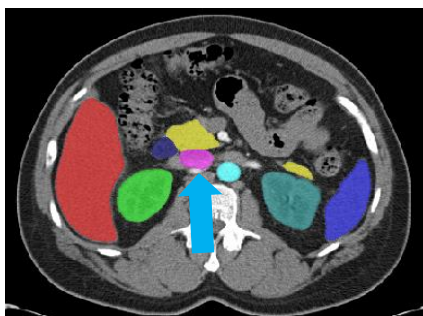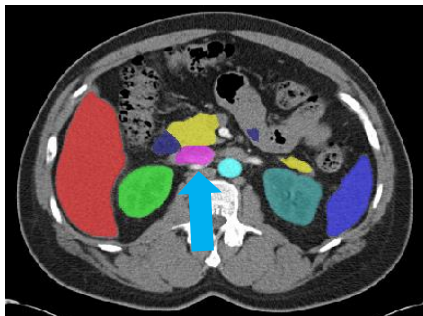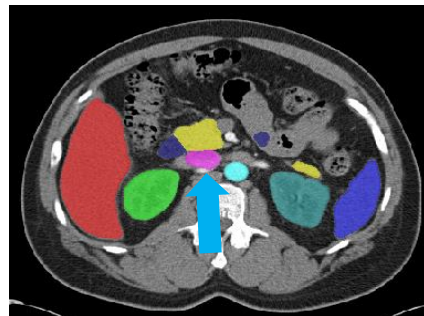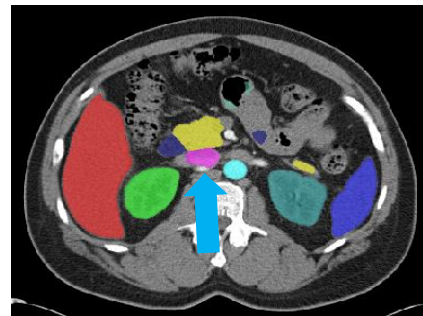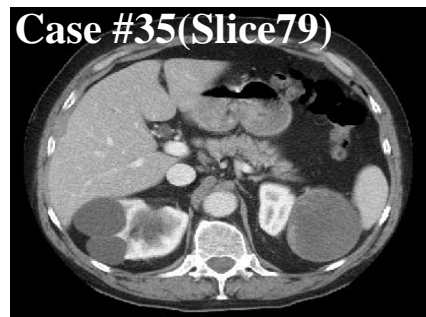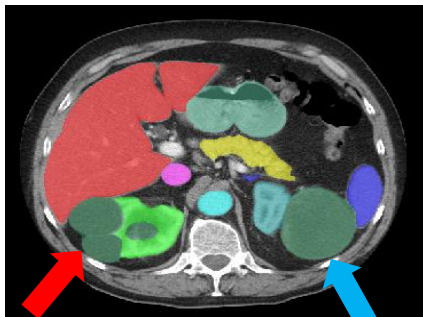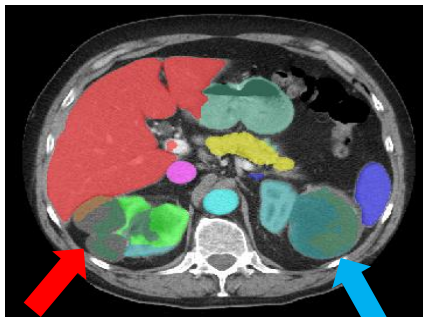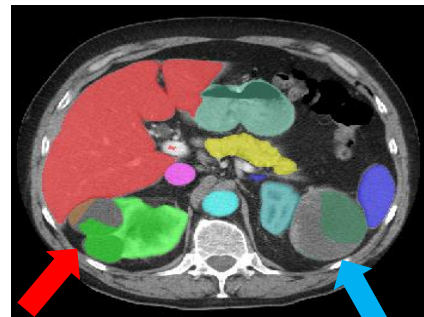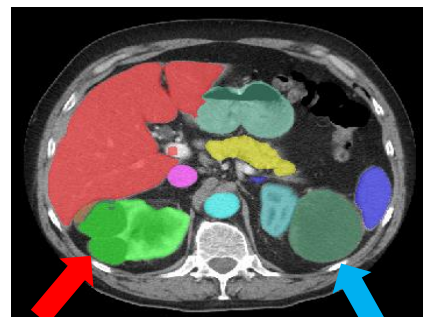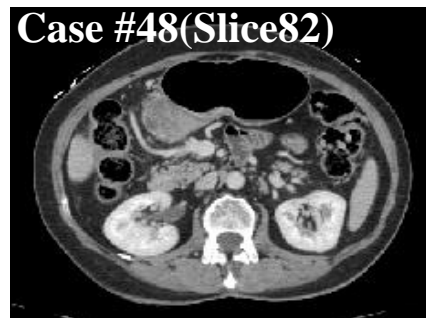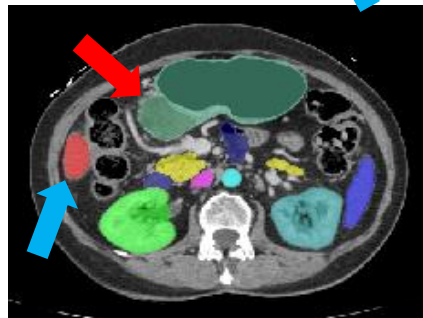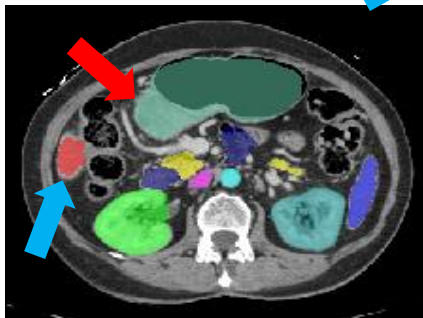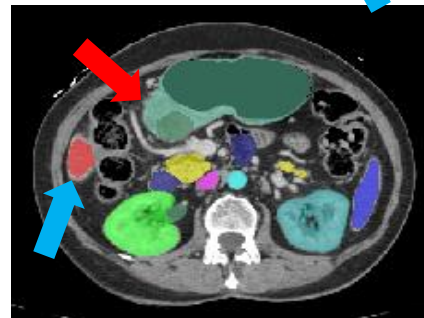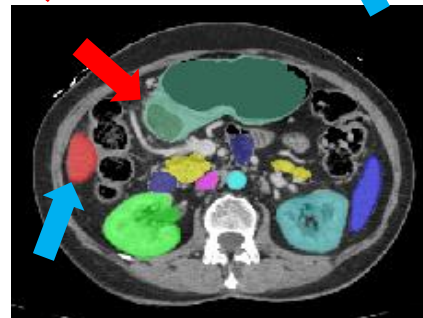

Input image

Ground Truth

Baseline

Baseline+LF

Baseline+LF+SP

Supplement: supplementary_material [file attachment]

—Self-supervised Pre-training—

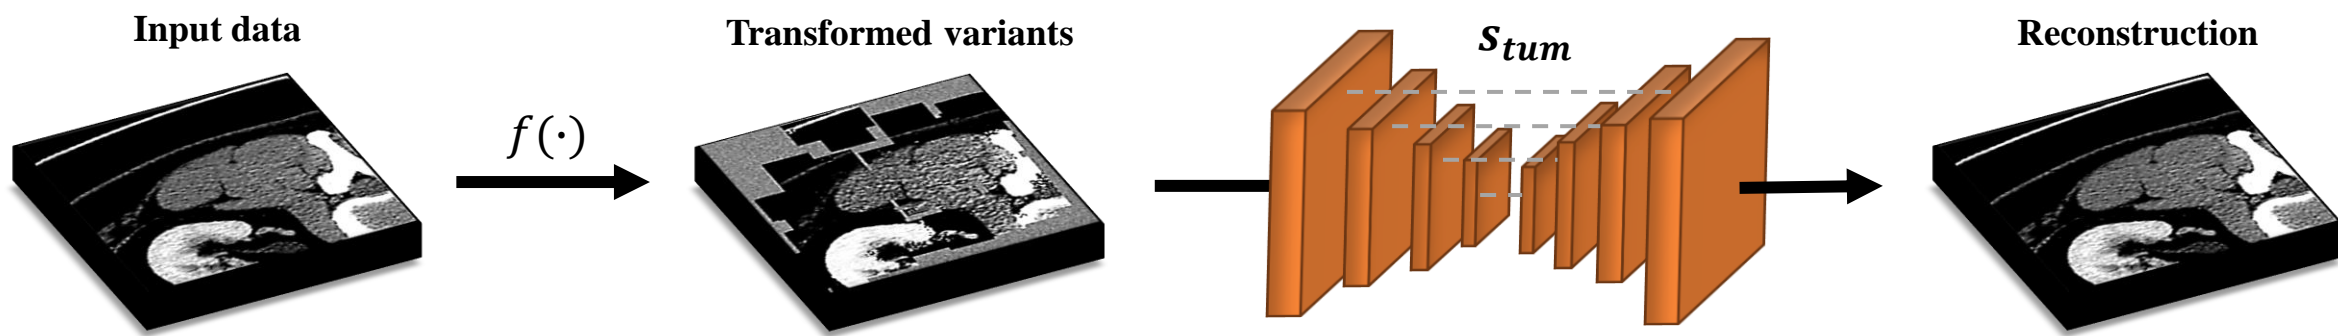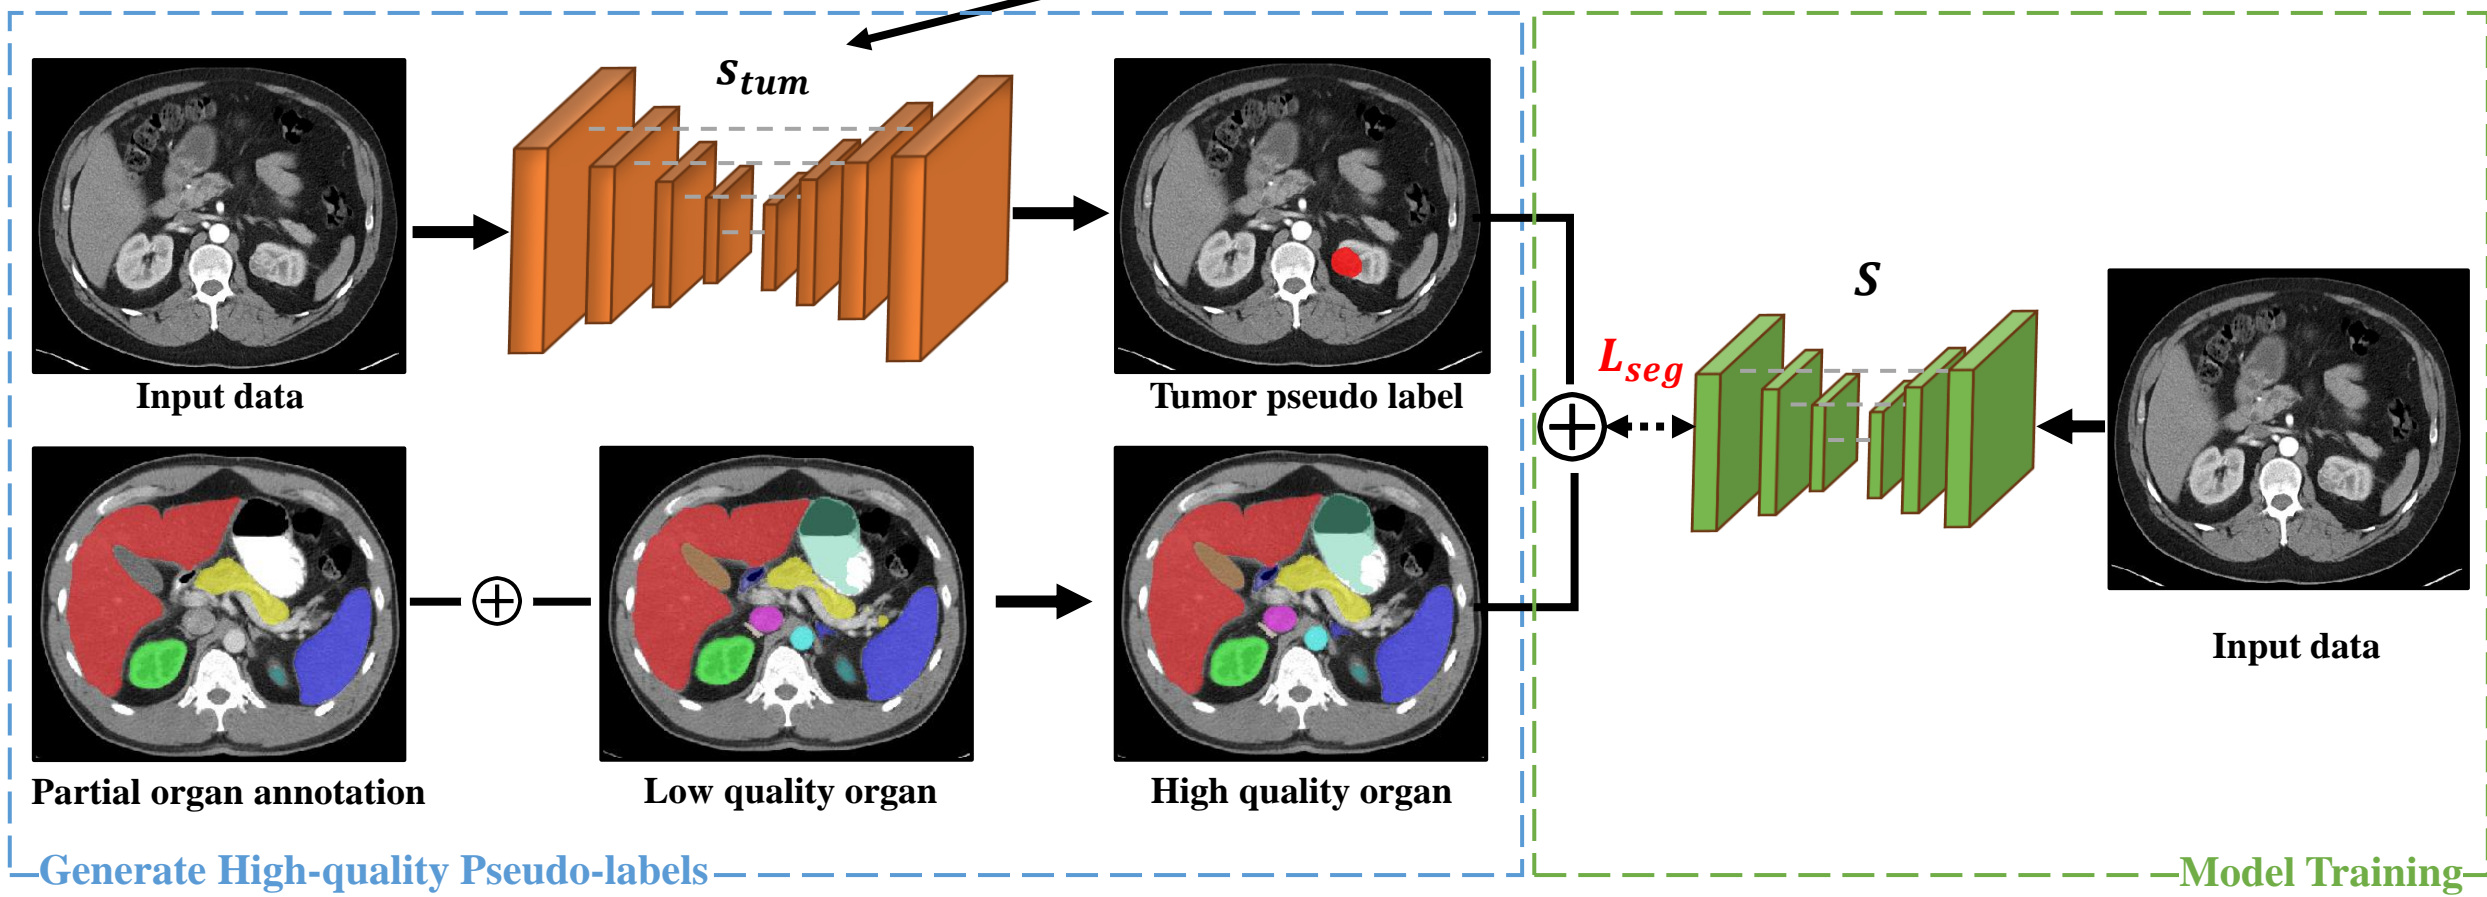

Supplement: supplementary_material [file attachment]

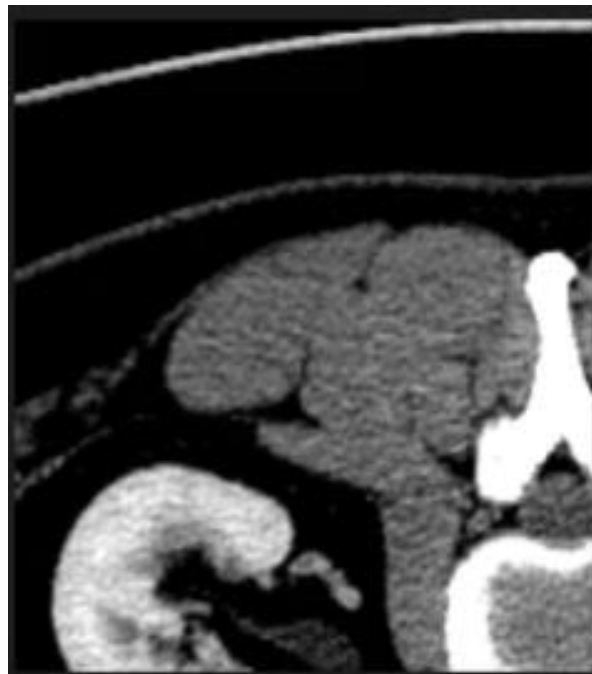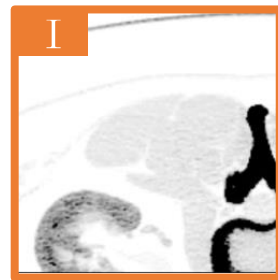

NL

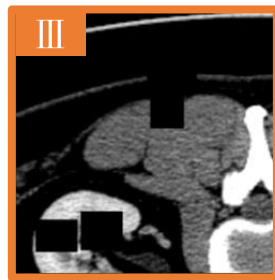

IP

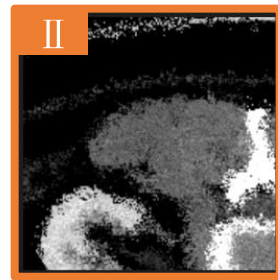

LS

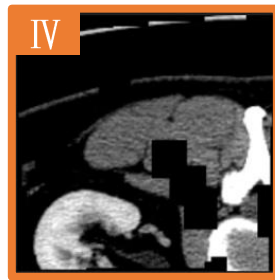

OP

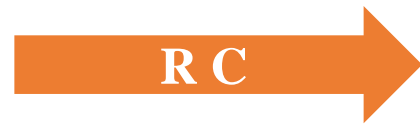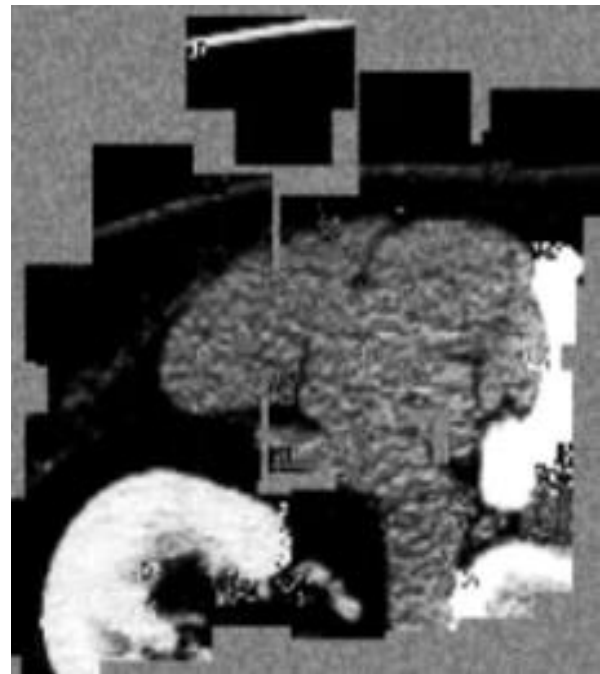

Supplement: supplementary_material [file attachment]
